# Supplementary material
Source: PubMed Central journal article supplement (PMC6369573)
Supplement: mmc1.pdf [file mmc1.pdf]

**The American Journal of Human Genetics, Volume 104**

**Supplemental Data**

**Gene Augmentation and Readthrough**

**Rescue Channelopathy in an iPSC-RPE Model**

**of Congenital Blindness**

**Pawan K. Shahi, Dalton Hermans, Divya Sinha, Simran Brar, Hannah Moulton, Sabrina Stulo, Katarzyna D. Borys, Elizabeth Capowski, De-Ann M. Pillers, David M. Gamm, and Bikash R. Pattnaik**

# **Gene augmentation and read-through rescue channelopathy in an iPSC-RPE model of congenital blindness**

**Authors:** Pawan K. Shahi<sup>1,2</sup>, Dalton Hermans<sup>1</sup>, Divya Sinha<sup>2,3</sup>, Simran Brar<sup>1</sup>, Hannah Moulton<sup>1</sup>,  
Sabrina Stulo<sup>1</sup>, Katarzyna D. Borys<sup>3</sup>, Elizabeth Capowski<sup>2,3</sup>, De-Ann M. Pillers<sup>1,2,4</sup>, David M.  
Gamm<sup>2,3,5</sup>, Bikash. R. Pattnaik<sup>1,2,5</sup>†

## **Affiliations:**

<sup>1</sup>Division of Neonatology, Department of Pediatrics, University of Wisconsin-Madison, Madison  
53706

<sup>2</sup>McPherson Eye Research, University of Wisconsin-Madison, Madison 53705

<sup>3</sup>Waisman Center, University of Wisconsin-Madison, Madison 53705

<sup>4</sup>Medical Genetics, University of Wisconsin-Madison, Madison 53706

<sup>5</sup>Department of Ophthalmology and Visual Sciences, University of Wisconsin-Madison 53705.

†To whom correspondence should be addressed:

Bikash R. Pattnaik, Ph.D.

Department of Pediatrics, University of Wisconsin

1300 University Avenue, Room 112 SMI, Madison, WI 53706, USA

Tel.: +1 608 265 9486, Fax: +1 608 262 6298

Email: bikashp@pediatrics.wisc.edu

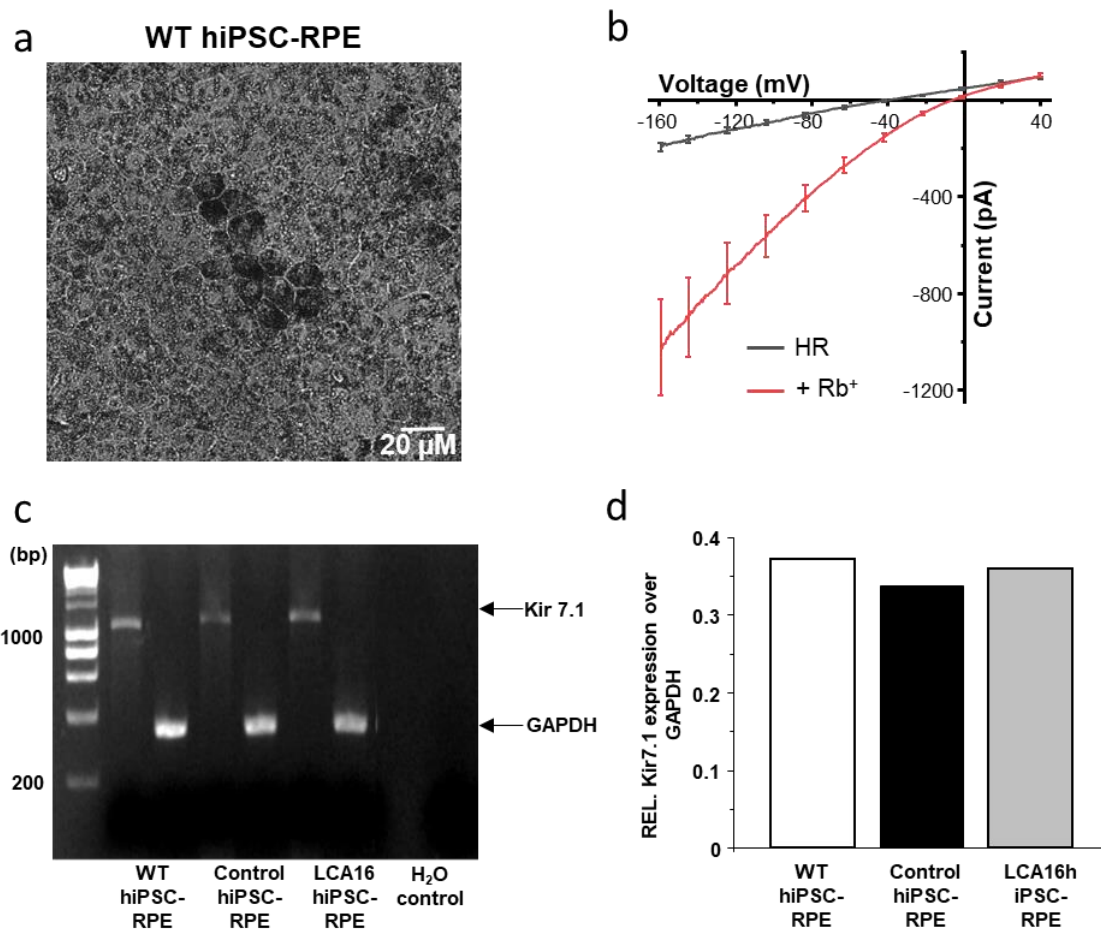

**Figure S1**

**Kir7.1 phenotype in wild-type hiPSC-RPE cells.**

(a) Bright field image of wild-type hiPSC-RPE tight monolayer in transwell culture. (b) Whole cell recording in isolated cells to demonstrate Rb<sup>+</sup> induced increase in Kir7.1 current. (c) Comparison of *KCNJ13* transcripts in wild-type, control and LCA16 hiPSC-RPE cells. For house-keeping gene GAPDH was amplified using forward primer - GTCAGTGGTGGACCTGACCT and reverse primer - TTCCTCTTGTGCTCTTGCTG resulting in a 329 bp product. (d) Comparable *KCNJ13* (relative to GAPDH) transcript expression in wild-type, control, and LCA16 hiPSC-RPE cells.

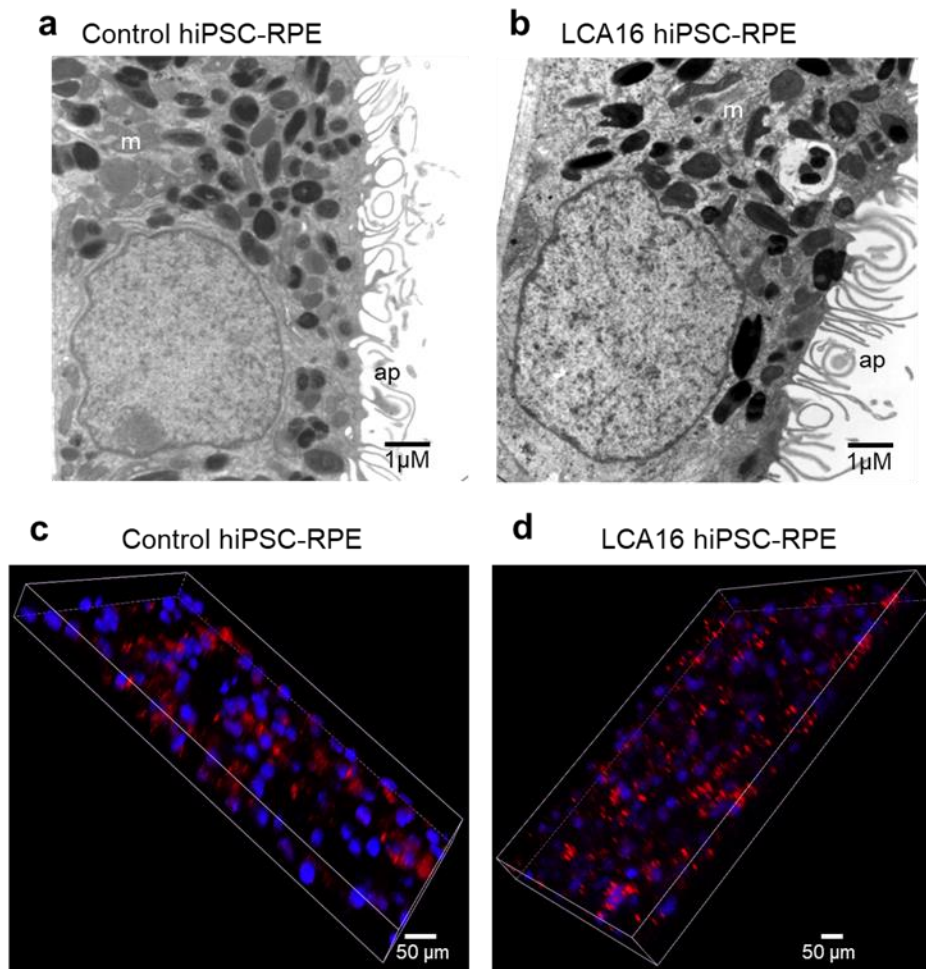

**Figure S2**

**Phenotype of affected individual derived iPSC-RPE cells.**

Comparison of electron micrograph of a control hiPSC-RPE cell (a) and an LCA16 hiPSC-RPE cell (b) showing normal columnar morphology with basal infoldings, large nuclei, mitochondria (m), melanosomes and intact apical membrane with extending processes (ap). Images of live control hiPSC-RPE (c) and affected individual derived hiPSC-RPE (d) cells in x-y-z dimension showing POS (red) and nuclei (blue) imaged 6 days after feeding cells for 1 day with fluorescent-labeled bovine POS. More undigested red fluorescent POS particles are visible in LCA16 hiPSC-RPE cells.

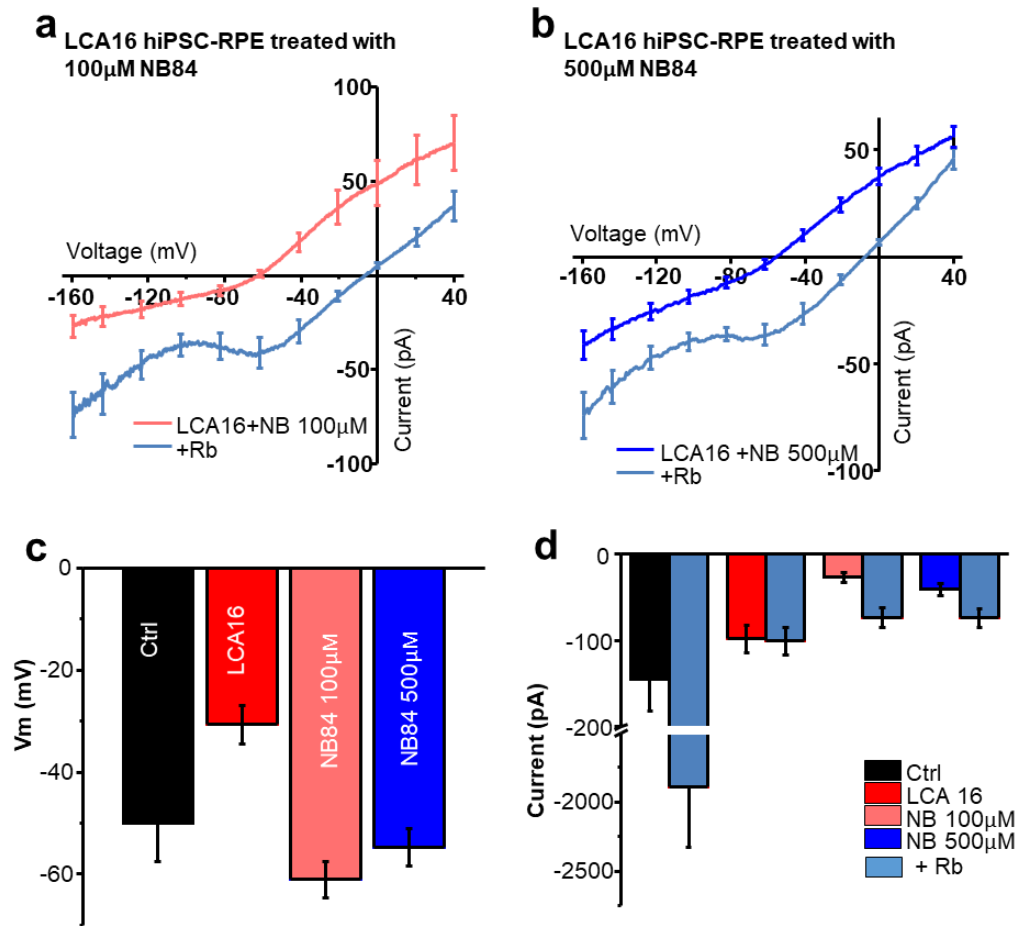

**Figure S3**

**Subpopulation of hiPSC-RPE show rescue in membrane potential but not current amplitude.**

a) I/V plot of average current response in a subgroup of LCA16 hiPSC-RPE cells in normal  $\text{K}^+$  Ringer's and high  $\text{Rb}^+$  Ringer's solution after treatment of cells with 100  $\mu\text{M}$  NB84. b) I/V plot showing  $\text{K}^+$  and  $\text{Rb}^+$  current response in LCA16 hiPSC-RPE after treatment with 500  $\mu\text{M}$  NB84. c) Average plot of membrane potential showing rescue of membrane potential to control levels after treatment of LCA16 hiPSC-RPE with 100 or 500  $\mu\text{M}$  NB84. d) Current amplitude plot clearly demonstrating no rescue in current amplitude after treatment with either 100 or 500  $\mu\text{M}$  NB84.

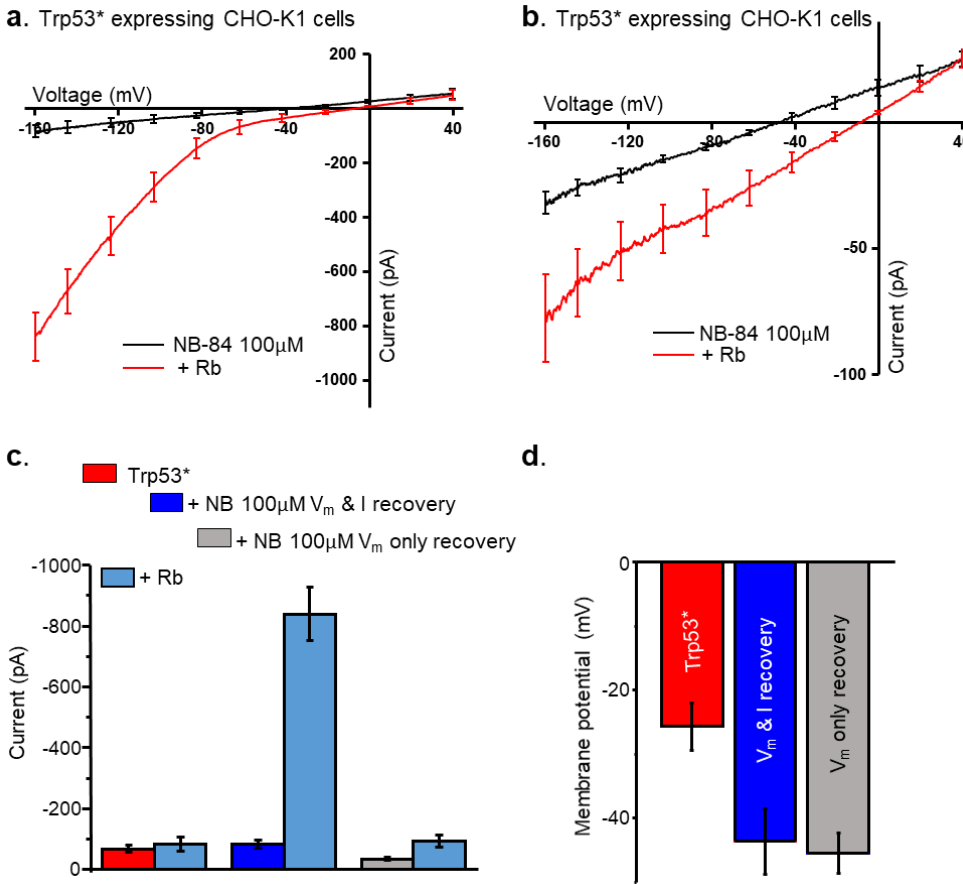

**Figure S4**

**Read-through of Trp53\* ectopically expressed in CHO cells.** As in LCA16 hiPSC-RPE cells, transduced CHO cells showed inwardly rectifying Kir7.1 current activated by Rb+ only after treatment with NB84. a) I/V plot of cells showing K+ (black) and Rb+ (red) current after treatment with NB84 showing recovery of both current amplitude and membrane potential. b) A group of NB84 treated cells showing somewhat linear I/V plot for K+ (black) and Rb+ (red) illustrating recovery of only membrane potential but not current amplitude. Comparison of average recovery of both current amplitude (c) and membrane potential (d) after treatment of Trp53\* expressing CHO cells.

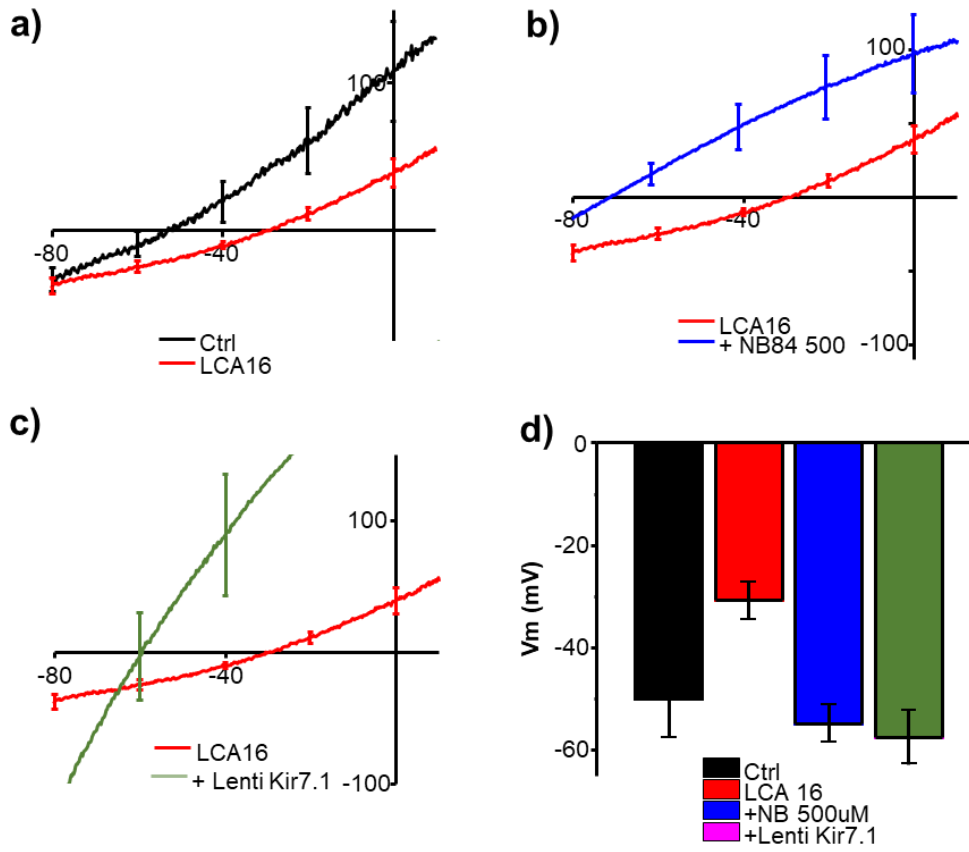

**Figure S5**

**Comparison of the Rescue of membrane potential across treatment modalities.** a) On an expanded scale of the x-axis, resting membrane potential of control (black) and LCA16 iPSC-RPE (red) showed a positive shift in I/V plot. b) For the LCA16 iPSC-RPE cells (red trace), treatment with NB84 shifted the I/V-plot to negative (blue). c) Plot of average I/V also showed a negative shift of resting potential after gene augmentation (green). d) Bar graph comparison of resting membrane potential showed recovery of LCA16 iPSC-RPE to control level after treatment with NB84 or upon gene augmentation.

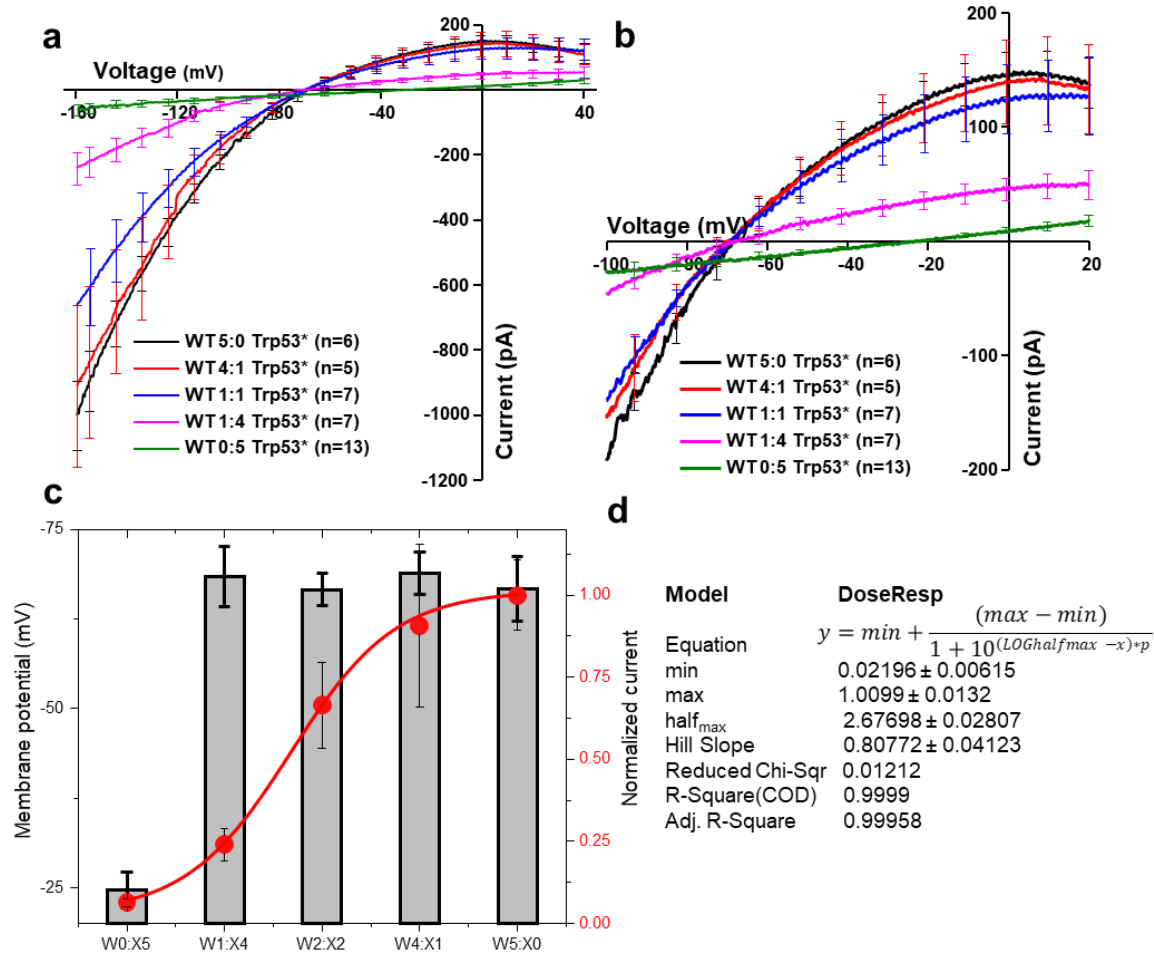

**Figure S6**

**Determination of the extent of wildtype protein expression required for functional rescue.**

We were particularly interested in quantitating how much gene augmentation/correction is required to restore channel function. We expressed either Trp53\* or wild type Kir7.1 protein alone or in various combinations in CHO cells. a) Current recordings are shown as I/V plots. b) On an expanded scale for x-axis, resting membrane potential shows negative shift with wild type protein making up only 20% of the protein expression. c) Average plot of either normalized current amplitude (filled circles) or membrane potential (grey bar) as a function of increasing wildtype protein expression. Solid line is a best fit for distribution using equation shown on the right. Half-maximum current was obtained with about 26% of the wild type protein expression.



## **Video**

**Normal Kir7.1 (green) expression in apical side of the LCA16 hiPSC-RPE cells.** Video reconstruction from Z-stack images of LCA16 hiPSC-RPE a week after transduction with lentivirus carrying eGFP-Kir7.1 driven by EF1a promoter. Highlighted are apical and basal sides of the tissue, optical sections, tight junction marked with antiZO-1 antibody (red) and nucleus with DAPI (blue).
